# Supplementary material
Source: publisher site journal article supplement (https://www.dovepress.com/article/508770)
Supplement: Supplementary file 1 [file %2525255B508770%2525255DAppendix%20%2525255B1%2525255D.doc]

Appendix 1 Outline of Interviews with Interviewees

| Participant Group | Interview Outline |
| --- | --- |
| Patients | (1) How was your current medication regimen decided upon and were you consulted?  (2) What kind of interaction or guidance did the healthcare professionals give you during the medication process? How did you feel?  (3) Are you willing to participate in medication decision-making? What are the influencing factors?  (4) How did you get information during the medication process? What help and support do you need?  (5) What suggestions do you have for healthcare professionals in terms of medication guidance? |
| Caregivers | (1) How was the patient’s current medication regimen decided?  (2) Are you willing to participate in medication decisions? What are the influencing factors?  (3) What aspects of the medication process do you think require assistance from healthcare professionals?  (4) What suggestions do you have for healthcare professionals in terms of medication guidance? |
| Healthcare Professionals | (1) Can you talk about the current situation of elderly patients with multi-morbidities and caregivers’ participation in medication decision-making?  (2) How do you feel about involving elderly patients with multi-morbidities and caregivers in medication decision-making given your work experience?  (3) What factors do you think influence the involvement of elderly patients with multi-morbidities and caregivers in medication decision-making?  (4) What are your suggestions for promoting the involvement of older patients with multi-morbidities in medication decision-making? |
